# Supplementary material for: A leading-edge based method for correction of slope-induced errors in ice-sheet heights derived from radar altimetry
Source: Copernicus journal article supplement (doi:10.5194/tc-2021-176), 2021-07-20
Supplement: Supplementary file [file tc-2021-176-AC1-supplement.pdf]

First, we would like to thank the referee for reviewing and commenting the manuscript. Please find the item-by-item reply below, with the original comments in *italics* and the responses in blue. The suggested changes will be implemented in the revised text.

*This manuscript describes a new approach for relocating radar altimetry measurements acquired over ice sheets; one of the most important processing steps for retrieving reliable surface elevation measurements. The authors outline the method, together with a proof-of-concept study whereby the approach is applied to one year's worth of CryoSat-2 LRM measurements over the interior of Greenland. They perform validation relative to ICESat-2 measurements and an independent DEM, alongside a sensitivity analysis to explore some of the inherent assumptions within their approach.*

*I found the manuscript very interesting; the proposed methodology is novel and definitely has the potential to improve upon current approaches documented in the scientific literature and implemented within ESA's ground segment. I therefore believe that it will be of interest to the subsection of The Cryosphere's readership that have an interest in radar altimetry processing techniques over ice sheets, ice caps and glacier surfaces. That being said, I believe that there is still some additional work required to (1) convincingly demonstrate the superior performance of the method relative to existing approaches, and (2) to provide the necessary level of methodological detail required to adequately document this promising new method. Without this, I am left feeling that I have a glimpse of an exciting new approach, but have many unanswered questions that prevent me from being fully convinced that it delivers the improvements that the authors claim. I hope that, by addressing these points, the authors will be able to provide a more compelling demonstration for The Cryosphere's readership. I have detailed these major comments below and would like to see each of them addressed in the revisions. Following these comments I have also listed a number of more minor points, which I hope will help to improve the clarity of the manuscript. Finally, I would recommend that the manuscript undergoes a thorough check for grammatical errors, as there were a considerable number throughout.*

We thank the referee for the constructive review and suggestions. We regret that our explanations were not always clear. Based on some of the comments, we found that some important (technical) details regarding the methods and the setup of the experiments were missing. We will elaborate on this below and clarify that with relevant details in the revised manuscript. We also found a small flaw in our implementation of the point-based method (Roemer et al., 2007). This caused that the refined search of the impact point on a 10 meter grid did not work as expected. Hence, the impact point we found was the impact point on a 100 m grid. After correcting the code, we found an improved performance of the point-based method. Still, though, our LEPTA method shows the best performance when compared to ICESat-2 data. Please see our detailed responses below.

### **Major comments**

- **Performance of LEPTA relative to other approaches.**

*The authors compare LEPTA to the ESA L2I product, and their own in house versions of the slope correction method and the Roemer et al. (2007) relocation method. Whilst the statistics*

*show the superior performance of LEPTA, I am left with several important questions relating to the implementation of other approaches, which make it difficult to determine whether they have been implemented optimally; i.e. whether a better implementation could have yielded improved results more closely matching the performance of LEPTA. Specific points that I would like to see addressed are as follows:*

- For ESA L2I – have any of the quality flags included within the product been applied? More L2I data are available than for the in house methods and this makes me wonder whether stricter quality control has been applied in the latter, e.g. the waveform filtering mentioned on line 289. In other words, that some of the improvement of LEPTA relative to L2I is not due to the method used slope correction, but simply down to the quality control applied.*

*This is a good point. The quality flags indicated in Section 4.3.3 of Bouzinac (2012) are used to exclude flagged data. Furthermore, we reject a waveform if i) the integrated power exceeds a threshold (defined as 150 by the software default) ii) in case the normalised power in the first 10 range bins is larger than 0.2, or iii) our peak-algorithm fails to identify a peak in the waveform. In the revised version of the manuscript, we will apply the latter criterion also to the L2I data (was not the case earlier). Preliminary analysis shows that these quality flags result in the removal of some large outliers and reduce the number of L2I data points to the same amount as obtained for the in-house processed L2 datasets. As such, also the statistics of Table 1 will improve (which, according to the referee's comments, will be replaced by cumulative distribution figures). So, indeed, part of the improvement was due to the applied quality control. At the same time, however, LEPTA still shows significant improvement compared to ESA L2I. We will add the necessary details regarding the applied quality control to Section 2.1 and update all the figures.*

- For the authors' in house 'slope correction' method – the results, e.g. as shown in Fig 4, indicate far worse performance than the ESA L2I implementation, and make me concerned that their slope correction method has been implemented sub-optimally. This, combined with point 1 above, means that I do not think that a convincing case has been made to justify the level of improved performance of LEPTA relative to the slope correction approach. This is not to say that LEPTA is not an improvement, but just that I feel that more work is required to justify this convincingly. Specifically, if the authors really believe that the difference between L2I and their in-house implementation relates to the Doppler slope correction, then I would like to see further analysis to demonstrate (1) that this really is the case (i.e. that the Doppler slope correction can be responsible for a difference of this magnitude), and (2) why it does not affect LEPTA in the same way (and should not be incorporated into the LEPTA L2 processing). I would also like the authors to state the DEM resolution used for the slope correction (I couldn't seem to find it anywhere), and if it is 900 m or less, to justify why this is an appropriate choice. From my perspective, the 'resolution' should be comparable to the beam limited footprint (i.e. 10's of km), not the pulse limited footprint, because it is preferable to relocate using the large scale slope across the illuminated area. If you use the '900 m' slope at nadir, then there is the risk that the slope you use will not be representative of the average slope across the illuminated area. Indeed I think you could be seeing this effect in Figure 7, where performance improves up to a resolution of 900 m, and raises the question as to whether you would see further improvements if the resolution was increased any more. As such, I would like the*

*authors to either provide a justification to counter the above concerns, or to test this by computing the slope over a larger length scale (comparable to the beam limited footprint) and re-evaluating the performance of their slope-based method.*

Indeed, the DEM resolution we used was 900 m. This choice was motivated by the fact that we wanted to use a resolution that is close to the resolution used by ESA (1 km). In addition, we relied on the results obtained by Levinsen et al. (2016) who showed that over the interior ice sheet, the DEM resolution has little impact. Note that they tested resolutions up to 8 km. Anyway, the concern of the referee is valid. Hence, in the updated manuscript, the chosen DEM resolution for the slope method will be the one for which the differences compared to ICESat-2 results in the lowest median and median absolute deviation. Here, we searched over an interval from 1 to 5 km with steps of 500 m. The optimal resolution we found this way was 2 km. We will add the results to the revised manuscript.

Our statement that *'the difference between L2I and our in-house implementation relates to the Doppler slope correction'* originates from the discussion section of Levinsen et al. (2016). However, in their study they used Envisat Radar Altimetry-2 data. As such, we agree that the statement is not applicable and will be removed in the revised manuscript. To interpret the differences between our in-house slope correction method and the ESA L2I implementation, we used the DEM suggested in CryoSat-2 Baseline D Handbook (<https://earth.esa.int/documents/10174/125272/CryoSat-Baseline-D-Product-Handbook>, last access: Dec. 3 2021) and a 25% threshold to try to obtain similar results to ESA L2I products. However, the agreement compared to the ESA L2I product did not change (please see the attached figures). This makes us conclude it does not depend on the DEM or the OCOG threshold.

At this stage, we can only state that our results are in line with Levinsen et al. (2016). They report differences (Table I+II Levinsen) between 'ESA relocation' and their slope method using a 1 km DEM of approximately 25/10 m (median) in a steep/smooth region, respectively.

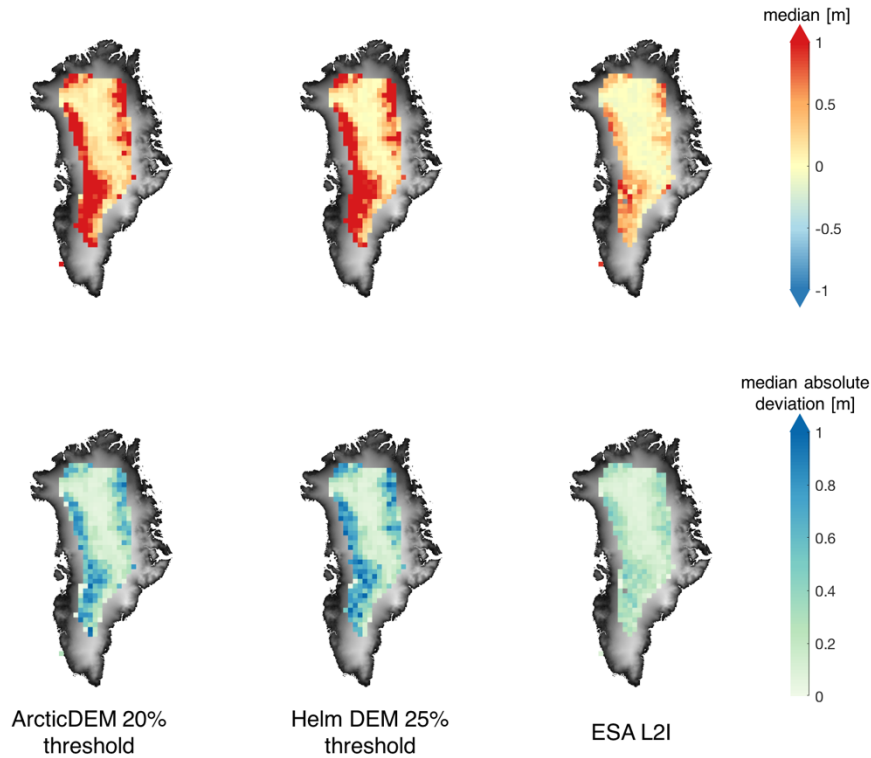

Figure 1. Comparison between in-house implementation using 2 km resolution ArcticDEM and 20% threshold for OCOG retracker (left panels), in-house implementation using the 1 km resolution DEM derived from Helm et al. (2014) as described in the CryoSat-2 Baseline D Handbook and 25% threshold for OCOG retracker (middle panels), and ESA L2I products (right panels). The visualised height difference is defined as CS2-ICE2.

- For the authors' point-based approach, I find the magnitude of the bias surprising, e.g. as shown in Figure 4, and that there is a general lack of detail or discussion required to assess whether this is due to the implementation of the approach. In particular, I cannot find any information relating to the search area that the authors have used; i.e. the illuminated area on the ground where they assume the leading edge reflection could have come from. It would be reasonable to base this upon the 3 dB beamwidth of the instrument, but it is not clear to me what the authors have used. As such, my concern is that an inappropriate choice could lead to a bias in the 'point-based' solution; for example if the criteria used is too strict, and does not allow for the POCA to be sufficiently far away from nadir. I would therefore like to see the authors (1) state what criteria is used, (2) justify why it is appropriate and not impacting the accuracy of the results, and (3) dependent upon these points, consider whether the performance of their point-based approach should be re-evaluated with a refinement to the allowed relocation distance.

We agree that the description of the search area should be improved. In the manuscript, we assumed a square shape of the PLF (similar to Roemer et al., 2007) with width of 2 km. The BLF was assumed to be a square of 16 x 16 km. These values are close to what is reported by Hai et al., 2021: 'Considering the average altitude of 730 km, an average antenna beam width of  $1.1296^\circ$  (the antenna shape of CryoSat-2 is an ellipse (Bouzinac, 2015)), the pulse length of 3.125 ns, and flat terrain, the beam-limited illuminated area (BLF) should be 14,393 m in diameter, and the smaller PLF size should be 1,654 m in diameter'. In the revised

manuscript, we will use values in line with Hai et. al., (2021): PLF = 1.65 km and BLF =  $14.393 \times 14.393$  km, as we consider them more accurate. We will add this information to the revised manuscript and the references. So, the bias in the point-based method is not related to inappropriate choices of the BLF/PLF.

We agree that the magnitude of the bias in the point-based method is large. This bias, though, seems to be partly introduced by a flaw in our implementation of the method. The method published by Roemer et al. (2007) includes a refined search step based on a high-resolution grid of 10x10 m which was skipped in our implementation. Preliminary results (please see below) show that with the new settings and revised code, both the median differences and median absolute deviation values are lower.

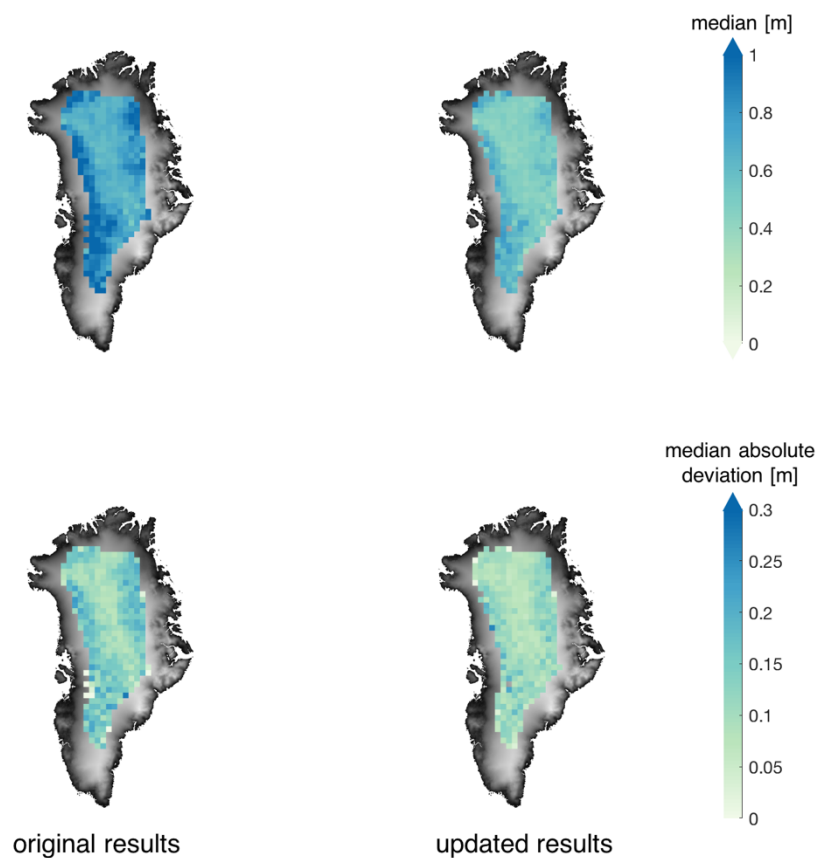

*Figure 2. Difference between the original in-house implementation (left panels) and the improved in-house implementation (right panels) of the point-based method. The visualised height difference is defined as CS2-ICE2. Both the median and median absolute deviation values have improved.*

- **Choice of delta-r.**

*The choice of delta-r seems rather arbitrary, yet central to the LEPTA approach, and so I would like to see some more discussion relating to this point within the manuscript:*

- *From a theoretical perspective, clearly it would make sense to let delta-r vary according to the width of the leading edge of each waveform. I assume the authors have practical*

*considerations for why they chose not to implement this approach, and I think it would be helpful for readers if they could therefore expand on this within the manuscript, to explain why such an approach was not selected.*

Agreed. First of all, we regret that our description in the manuscript was limited. In fact, what we referred to as the 'end of the leading edge' ( $r_{\text{end}}$ ) was defined as  $r_{\text{end}} = \min(r_{60_{\text{rt}}}, r_{\text{rt}} + \text{delta-r})$ , where  $r_{60_{\text{rt}}}$  is the range obtained with a 60% threshold retracker and  $r_{\text{rt}}$  is the retracked range obtained with the OCOG retracker. Here, the use of  $r_{\text{rt}} + 3.5$  was to avoid that the search window becomes too large. This typically happens in case the waveform has multiple peaks before it reaches its maximum. Hence, in most cases we already used a width that depends on the waveform as suggested by the referee.

To avoid confusion in the revised version, we will no longer refer to  $r_{\text{end}}$  as the 'end of the leading edge'. Based on this comment and a later comment regarding the choice of  $r_0$ , we will modify the definition of  $r_0$  and  $r_{\text{end}}$  to the following:  $r_0$  will be defined as  $\max(r_{1_{\text{rt}}}, r_{\text{rt}} - \text{delta-r})$  and  $r_{\text{end}}$  as  $\min(r_{90_{\text{rt}}}, r_{\text{rt}} + \text{delta-r})$ . In doing so, we have just one parameter in the sensitivity analysis, namely  $\text{delta-r}$ .

- I appreciate this is extra work, and therefore I would not insist upon it, but given the central role that the leading edge plays in the LEPTA approach, I think it would be really valuable for the authors to provide some quantitative measures relating to the characteristics of the CryoSat-2 LRM leading edge over Greenland. For example, can you provide statistics relating to the mean and standard deviation of the range spanned by the leading edge? This would provide really helpful context for judging the validity of the range of  $\text{delta-r}$  considered.*

The mean and standard deviation of the leading edge width (defined as the difference between bin at the peak of the waveform and the bin where the normalised waveform power exceeds 0.05) is attached (please see the figure below). The tiling resolution is again 50 x 50 km (same as height differences). It is certainly true that the leading edge width can vary per location, and this discussion will be added in the supplementary material of the revised manuscript.



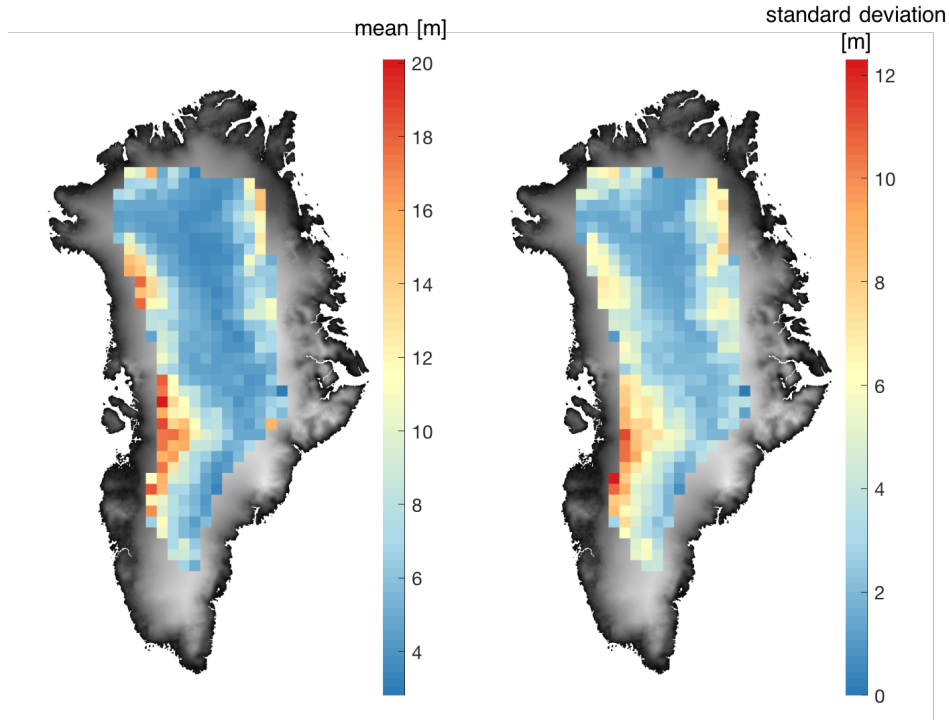

Figure 3. Mean and standard deviation of leading edge width (LeW) defined as  $X_{peak} - X_{norm>0.05}$ , where  $X_{peak}$  is defined as the bin index where the normalised power reaches the peak and  $X_{norm>0.05}$  is defined as the bin index where the normalised power exceeds 0.05. This range is larger in the margin regions of the LRM coverage than the inland regions.

- Without point 2 being addressed, it's not clear to me why delta-r of 2 metres is a reasonable lower bound. I would therefore like to see the sensitivity analysis expanded below 2 metres, or a justification for why this is not appropriate; as, in theory, choosing a lower threshold would seem a sensible approach to ensuring that you always identify terrain corresponding to the leading edge.

Please see our response above regarding the definition of  $r_0$  and  $r_{end}$ . We agree that a lower delta-r makes sense. In the revised manuscript, we will change the range over which we varied delta-r between 0.5-5 m (instead of 2-5 m in the original manuscript). Note that 0.5 is pretty close to the range resolution (0.469 m). Moreover that in case delta-r = 0.5, i.e., when  $r_{end} = \min(r_{60_{rt}}, r_{rt} + 0.5)$ ,  $r_{end}$  in most cases equals  $r_{rt} + 0.5$  (as indicated by the dashed black line in the figure below). Preliminary results based on the old definition of  $r_0$  and  $r_{end}$  show that the use of delta-r = 0.5 influences the median difference by ~1cm compared to ICESat-2 (please see attached figure).

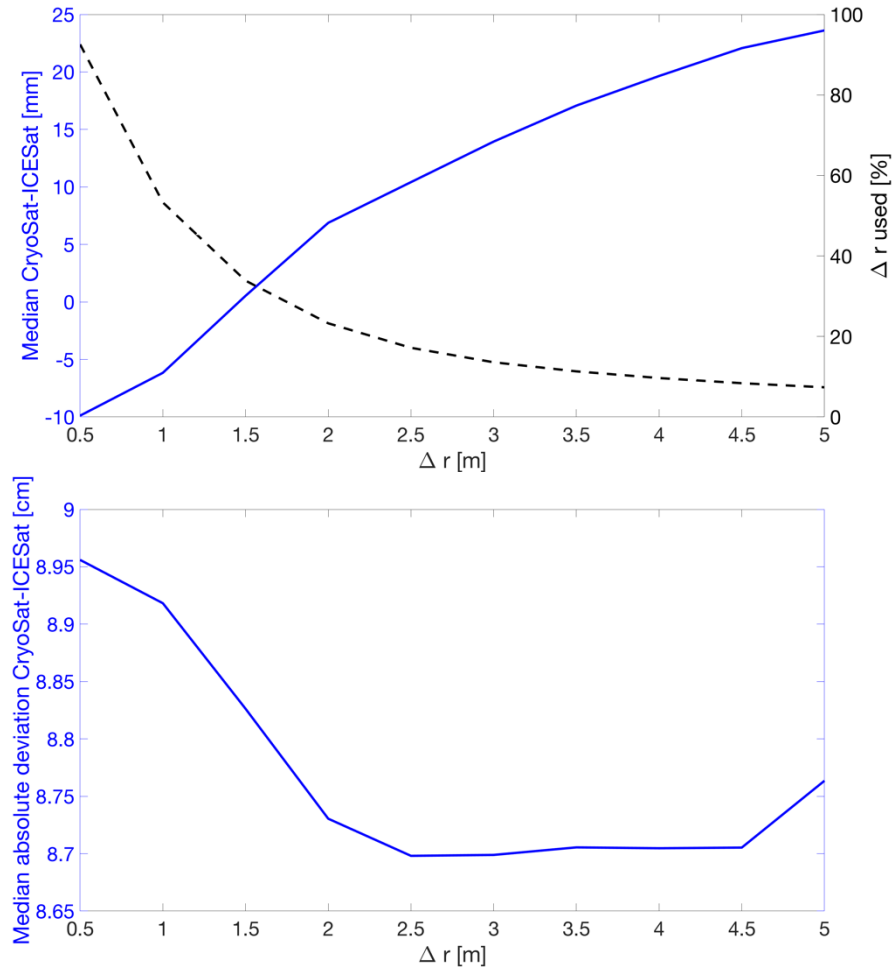

Figure 4. Median (upper solid curve) and percentage of points where  $r_{end} = r_{rt} + \Delta r$  (upper dashed curve), varying as a function of  $\Delta r$ , and median absolute deviation as a function of  $\Delta r$ . Outliers based on 10<sup>th</sup> and 90<sup>th</sup> percentiles are removed.

- I also suspect that the optimal choice of  $\Delta r$  might vary significantly spatially; yet this is impossible to assess based upon the median statistics presented. For example, that a  $\Delta r$  of 2 m or lower might perform much better over simple topography. Given the central role of  $\Delta r$  in terms of the LEPTA approach, I think it would be interesting to produce spatial maps of the type shown in Figure 4 for a LEPTA- $\Delta r$  of 1 m and 2 m, to see the extent to which this can improve upon the 3.5 m case already plotted.

We appreciate the suggestion, and the spatial maps will be added in supplementary materials.

#### • **Impact of penetration**

Throughout the manuscript, the issue of penetration into the snowpack is never mentioned. I do not think it requires further analysis, but I do think it would be helpful to include some discussion related to this phenomenon, and whether or not it has any implications for the LEPTA method; given that LEPTA uses range information from the leading edge, and the leading edge of LRM measurements can be modified by subsurface scattering.

Agreed to mention the issue. The reason to not mention it was that we carefully selected the threshold in our retracker to avoid penetration. According to Davis et al., (1997), a 20% retracker is a proper choice to determine the absolute ice sheet height. The motivation behind the sensitivity experiment in which we increased the threshold to 50% was in fact to



assess whether in this case we would observe penetration. As can be seen from the results, this is indeed the case. In the revised manuscript we will explicitly mention the issue (in particular in view of the results of the sensitivity experiment).

### **Manuscript minor comments**

*Line 2: anomalies in what – mass change, physical properties?*

Physical properties – this mainly refers to the massive melt event in Greenland in 2012, where meltwater was produced and subsequent sub-surface ice lenses were observed. We will clarify this in the revised manuscript.

*Line 4-5: Perhaps I'm misunderstanding, but I think the 'slope' method and 'point-based' (I assume Roemer?) are correcting for undulating topography within the \*beam-limited\* footprint rather than the pulse limited footprint?*

Correct. Will be corrected in the revised manuscript.

*Line 9: Begin -> beginning.*

This will be corrected in the revised manuscript.

*Line 13: 'slope corrected' – I assume this relates to those using LEPTA? This should be made clear.*

True. This will be clarified.

*Line 13: 'Almost negligible' is rather vague – please be quantitative, especially as you quote statistics for the other methods and ESA L2. E.g. is it better than ESA L2 at 0.01 m difference?*

Agreed. Will be changed in the revised manuscript.

*Line 14: Which methods exactly do 0.22 m and 0.69 m refer to? Currently it is not clear. Same applies on line 16.*

Slope and point-based methods. This will be clarified.

*Line 14: Median absolute deviation from what?*

CryoSat-2 vs. ICESat-2. This will be clarified.

*Line 31: surface \*slope\* parameters.*

This will be changed in the revised manuscript.

*Line 31: Beam limited footprint?*

Agreed. This will be changed in the revised manuscript.

*Line 32: 'full height information' is not particularly clear for readers not familiar with the subject – perhaps something like 'uses a topographic model...' would be clearer?*

In the revised manuscript, we will use the suggestion of the referee.

*Line 35: Not clear whether you are referring to pulse limited or beam limited footprint. As a more general point, I would recommend that you make sure that through-out the manuscript that it is unambiguous which you are referring to.*

Agreed.

*Line 54: Please state which CS2 product baseline was used.*

Baseline D. This will be specified in the revised manuscript.

*Line 56: Is the data used inclusive of these end months? Important for future reproducibility.*

We use all data between Jan. 1, 2019 – 31 Dec. 2019. This will be clarified in the revised manuscript.

*Line 66: use -> used.*

This will be corrected in the revised version.

*Line 66: What is 25% more realistic than? Do you have any supporting evidence for this statement?*

More realistic than 10% and 50% as discussed by Davis (1997) and Aublanc et al. (2018). We will clarify the sentence and add the references.

*Line 68: Please explain what you mean by 'a distinguishable noise' and what criteria exactly were used to identify the waveforms that failed this and the 'beginning of leading edge' tests; i.e. so that the reader has sufficient information to be able to reproduce your method, should they wish.*

A waveform is rejected in case: i) the integrated power exceeds a threshold (defined as 150 by the software default) ii) in case the normalised power in the first 10 range bins is larger than 0.2, or iii) our algorithm to identify peaks in the waveform does not return a peak.

*Line 70: 'as \*a\* benchmark'.*

This will be corrected.

*Line 71: 'which has a resolution'?*

This will be corrected.

*Line 84: Please also mention which ATL- product was used.*

ATL06. Will be added to the revised manuscript.

*Figure 1. I find this figure pretty hard to interpret and I think it would benefit from some more attention:*

- *Why is the low resolution DEM only given in the slope method panel?*

Because the low-resolution DEM is only used by the slope method. The other methods rely on a 'high-resolution DEM.'

- *I don't think 'apply the satellite-terrain range' really makes sense.*

We will change the last sentence of the caption into 'The slope method computes a correction based on the surface slopes obtained from a DEM, whereas the point-based method and LEPTA are based on the range between satellite and terrain'.

- *I think 'block mean averaged' could do with more explanation in the caption – presumably you mean the average range over either a square, rectangular or circular search window? What is the radius used in these graphs, or is it just a cartoon drawing to illustrate the concept?*

We will change 'block mean averaged' to 'averaged range over a square'.

Indeed, this figure is just a cartoon to illustrate the concept. We will clarify it by replacing 'Illustration...' by 'Conceptual illustration...'

- *Might be also worth annotating with the true POCA as well?*

We decided not to do so as we do not show the 'true' terrain to avoid the plots getting too busy. Moreover, it is just a conceptual illustration.

*Line 98: 'is the central angle between the satellite and Ps'. I don't think this is very clear. I'm not sure what the 'central angle' means, and also that it is correct. Doesn't it depend upon the instrument boresight, which might not necessarily be pointing at nadir?*

$\Gamma = \arcsin( (R \sin(\text{slope magnitude})) / R_s )$  where R is the retracked range measured by the altimeter and  $R_s$  the radius of curvature of the ellipsoid at the sub-satellite point and the altitude. To avoid any confusion, we will include the equation given by Bamber 1994.

*Figure 2: This figure feels somewhat rough and not ready for publication:*

- *Where is this data from? A location map would be helpful.*
- *Why does the header say natural neighbour but the caption say nearest neighbour? What is  $h_{ICE}$ ? ICESat-2 elevation? If so, how should the statistics be interpreted given that point-based method is much further from the IS-2 track than LEPTA? For example, has a correction been applied to account for the effect of surface slope between the CS2 and IS2 locations?*
- *What is  $d_{min}$ ?*
- *How were the ICESat-2 tracks that are plotted selected?*
- *Visually, I think it would be easier for the reader to interpret if the DEM was displayed as a contour map; but this is only a recommendation, not essential.*

The figure will be improved according to the comments.

*Line 117: It's not clear to me why you are dividing by R? Also equation is not numbered.*

This is a mistake from our side; R should have been the area of the PLF ( $1.65^2 \text{ km}^2$ ). We will correct the equation in the updated manuscript. We will also add an equation number.

*Line 123: I think it would be helpful to expand upon this final sentence slightly, as I think it is important to convey this point, as it's your main argument relating to the limitation of Roemer. It is not clear what 'It' refers to in 'It also shows'. For example, I don't think that Roemer uses DEM points other than the POCA within equation 4, rather it is only in identifying the location. This distinction is not clearly articulated with the current wording.*

Agreed. 'It' refers to the not numbered equation. We will clarify the sentence in the revised manuscript.

*Line 134: Please provide justification for why  $8 \times 8 \text{ km}$  is chosen as the search radius for the intersection points. It seems quite an arbitrary choice, with no justification given. For example, why not use something closer to the 3dB beamwidth, which would seem to have a much better physical justification? Otherwise, how can you be confident that you are not incorrectly locating measurements where POCA is greater than  $4 \times 4 \text{ km}$  from nadir but still within the 3dB beamwidth, and therefore sensitive to the antenna gain pattern? At the very least, I would like to know how many measurements fail to identify DEM points within the search window? We agree with the referee that our justification should be improved. In the revised manuscript, we will use a BLF that is consistent to what is used in the point-based method.*

That is, we have used an approximately 14.393 x 14.393 km BLF (please see the attached figure).

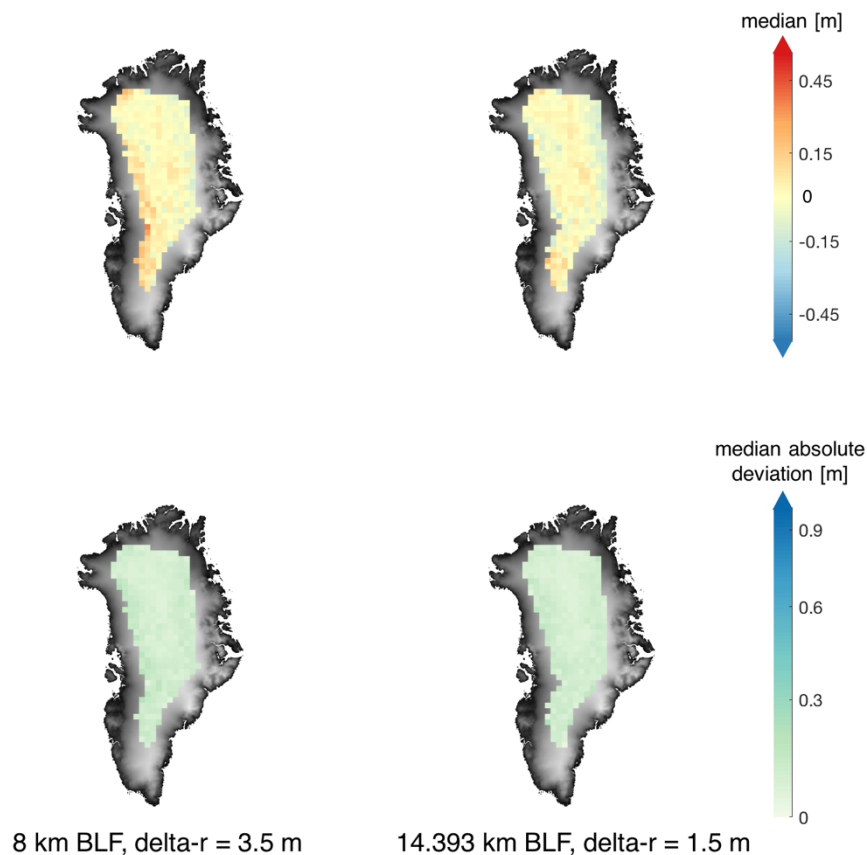

Figure 5. LEPTA using the original 8x8 km beam-limited footprint (BLF) and delta-r of 3.5 m (left panels), and the improved 14.393x14.393 km BLF and delta-r of 1.5 m (right panels). The visualised height difference is defined as CS2-ICE2. Median values are improved mainly on the western side of the ice sheet.

Line 136: 'In case no DEM grid points are identified...'. Please provide a clearer explanation of what you are doing here, as it seems important but I cannot understand exactly what you are doing here. Is the interval expanded? Or is it shifted? Is this the same as finding the DEM points that are \*closest\* to the retracked range, even if they are not within the search interval? If this is the case then I would like to see some more analysis to support this approach; e.g. are these points commonly at the edge of the 8 x 8 search window? Is there a systematic bias in terms of whether the retracked range is normally higher or lower than the DEM range? I think this is required because it seems like this is somewhat at odds with the central tenet of your method which is to only use points within the leading edge interval, so it's not clear to me why this is justified. It relates to the previous point too – in that the underlying issue might be that in these cases POCA lies beyond the 8 x 8 km search window – and it isn't clear to me that what you are doing here is an appropriate way to correct for this issue.

The interval is shifted. In the revised manuscript, we will use a BLF of 14.393 x 14.393 km. In case no DEM grid points are identified, we define  $r_0$  by the range to the closest DEM point. We will clarify this in the text and add an analysis showing how often we encounter this situation.

*Line 137: Do you mean here that  $P(x,y)$  is computed as the average of the x and y coordinate values? If so, is this the mean, median or mode? Using this approach, I guess you could get a  $P(x,y)$  that is located outside of the LEPTA search area? Can you comment on this; e.g. how often it occurs and what the implications are?*

$P(x,y)$  is the mean of the x and y coordinate values. This point will always be in the 8x8/14.393x14.393 km search area (in the original/revised manuscript, respectively). What may happen (for all methods) is that the position is in between two equally large but disjoint sets of points. By assessing the minimal distance between the computed impact point and the set of identified DEM points we found that this happens in about 5.7% of the cases. In the revised manuscript, we will assess the impact of this on the error statistics.

*Line 139: Should there be a  $1/K$  averaging in equation 5?*

Correct. This will be corrected in the revised manuscript.

*Line 141: Slight aside and not essential, but do you have any statistics relating to the size of the LEPTA footprint – i.e. the intersect between the leading edge and DEM – it would be really interesting to see how much the reality diverges from the classical footprint size over a flat smooth surface.*

We agree this is very interesting. Apart from some limited case studies we did not assess this in full detail. We would like to make the code publicly available. We welcome the referee to study this aspect.

*Line 142: ‘but *are* outside’.*

This will be corrected.

*Line 151: Please explain what a ‘conceptual assessment’ actually means.*

ArcticDEM is not an independent DEM (it is used in computing the corrections). Hence, we do not consider this comparison as a validation. Still we think it is insightful, especially when CryoSat-2 points do not always have a validating ICESat-2 point within the 50 m search range. We thought about clarifying this using the phrase ‘conceptual assessment’. In principle, we meant to say that comparing to ArcticDEM is not a real validation, since it is not an independent dataset (which has been used to correct for the slope). We will clarify that in the revised version.

*Line 153: It’s not clear to me how meaningful the median statistic is, given the effective timestamp of the ArcticDEM. I.e. isn’t ArcticDEM referenced to ICESat, and in which case surely you need to account for the intervening elevation change of the surface?*

We agree that some care is needed in the interpretation of the median difference when comparing the ArcticDEM elevations and the Cryosat-2 elevations as i) there are indeed time stamp differences (e.g. due different moment of to ArcticDEM observations, co-registration with Icesat, etc) and ii) ArcticDEM is not an independent DEM validation data set as it is being used in the corrections. Therefore, we opted to call it DEM *evaluation* instead of *validation*. Nevertheless, we think the comparison with ArcticDEM elevations still adds useful information. Therefore, we opt to keep it in the paper, but we will add some discussion to the revised manuscript about the difference between validation/evaluation. A correction for

temporal elevation changes is not possible at the offered ArcticDEM resolution. In the validation with ICESat-2 data this 'ambiguity' is avoided.

*Line 160: In the case of nearest neighbour, is a correction applied to account for the effect of surface slope between the CS2 and IS2 locations? If not, why not and what are the implications? Given that ArcticDEM is already integrated into your processing flows, I assume it would be pretty simple to do this.*

So far we did not account for this effect. We initially considered that i) the maximum allowed distance is 50 m, which probably could not be significant for the LRM coverage, and ii) we would like to keep the validation independent of ArcticDEM. In the revised manuscript, we will follow the suggestion of the referee to compute the correction from ArcticDEM.

*Line 167: ' $h_{DEM} / h_{ICE2}$ ' – replace '/' with 'or' to avoid any ambiguity with a division operator.*

Agreed. This correction will be implemented.

*Line 169: Would it not make sense to also consider sensitivity to how the start of the leading edge is defined? Surely this is relevant too?*

Agreed. In the revised version, we will change the definition of  $r_0$  and  $r_{end}$ . By doing so, we will also assess the sensitivity of the start point of our search window.

*Line 186: 'best' relative to what – I assume you mean of all methods, but it could be construed as ArcticDEM vs IS-2, so worth making clear.*

Indeed. This will be specified in the revised manuscript.

*Table 1:*

- 'Before' and 'after' are not used in the table, so I would recommend not needing to refer to them in the caption.

Agreed. Will be removed.

- Please state whether differences are calculated as  $CS2 - ref$ , or  $ref - CS2$ .

$CS2 - ref$ . It will be added.

- I'm not sure how useful it is to list all the percentiles in a table. Have you considered showing these as a cumulative distribution figure instead? I think this would be much easier for the reader to interpret.

We agree with the suggestion of the referee. A figure will be added in the revised manuscript.

*Line 203: Suggest 'most ideal' -> 'performs the best'.*

Agreed.

*Fig 3: Comparing the LEPTA and L2I pdf's it looks like the main benefit from LEPTA is to reduce positive rather than negative differences. Any thoughts on why this might be? Could the lack of impact on the negative differences be due to the relatively large delta-r leading to DEM elevations beyond the leading edge being included – i.e. a smaller delta-r might deliver improvements here as well? I guess it would be fairly clear by looking at the full pdf in the sensitivity analysis, rather than just the central value?*



The observation of the referee is correct. We do not have a full explanation. However, based on how we defined  $r_{\text{end}}$ , the explanation given by the referee cannot be true. We agree with the last suggestion of the referee. In the revised manuscript, we will elaborate the analysis in this respect.

*Line 208: I would recommend using 'positive' and 'negative' elevation differences, rather than 'right' and 'left' side of the median.*

Agreed.

*Figure 4: It seems that LEPTA is much more clearly the best performer when compared to IS-2, rather than ArcticDEM in Figure 3. It is not clear to me why this is the case – is it linked to spatial coverage, differences in the timestamp of ArcticDEM relative to IS-2, or something else? I think it would be helpful for the authors to expand upon this here.*

In our view, this is mainly caused by i) the higher quality of the ICE-2 data compared to ArcticDEM, and ii) the comparison with ICE-2 data is done based on measurements that are acquired around the same time the Cryosat-2 data were acquired. Indeed, the timestamp of ArcticDEM is different. We will include this discussion in the revised manuscript.

*Line 218: Also covered in previous points. I'm not sure it is the timestamp of the optical images that is important – isn't it the data used to provide the absolute reference?*

We agree, and we will clarify it in the discussion.

*Fig's 5-7: Captions should state what it is the median and median absolute deviation of – i.e., CS2-minus-IS2.*

This will be improved.

*Line 229: More detail needed – is this for the full dataset or a subset? Is this with outliers removed?*

The full dataset with outliers removed. This will be specified in the revised manuscript.

*Line 230: It's not very clear to me how this choice of 2-5 m actually relates to the properties of the leading edge. I think it would help to justify this choice in the minds of the readers, if the authors could describe the typical width of the leading edge, and show that delta-r is a sensible choice within this context. For example, with the current analysis as it is presented, I am left wondering how common it is for the leading edge to be less than the 20% OCOG + 2 m; i.e. to lie outside of the range tested. From a theoretical perspective I could see that a delta-r value of 0.5-1 m could make sense, but there is no analysis to explain why this parameter range was not explored; nor indeed why the actual range of ranges spanned by the leading edge of each waveform was used. Did the authors evaluate what happened when delta-r < 2 metres?*

See our response to the major comments concerning the 'choice of delta-r' above.

*Line 244: I'm interested in why the sensitivity to a bias in the DEM is not symmetrical about zero. Can the authors expand upon this point; i.e. why having a biased-low DEM has very little effect, but biased-high does? Is this somehow connected to a generous choice of delta-r, i.e. that at 3.5 metres, it is actually including a significant buffer beyond the leading edge, such that when you bias the DEM low the true POCA still remains within the delta-r range? I think a slightly more in-depth evaluation and discussion for the observed behaviour would be useful*



*here in terms of understanding the method, rather than a simple 1 paragraph summary of the sensitivity results with minimal interpretation.*

Agreed. The revised manuscript will include a more in-depth evaluation and discussion.

*Line 254: Again, I think the manuscript would benefit from critical interpretation here, rather than simply reporting the bare results. For example, can the authors expand on why the point based approach degrades so quickly with increasing resolution – is it due to topographic peaks being smoothed? Wouldn't you expect the point-based approach to tend towards the slope based approach; i.e. with sufficient smoothing then you remove all high frequency topography and are just left with the long wavelength slope?*

Agreed. We will add this discussion to the revised manuscript.

*Line 259: 'reduces with 30 cm' – doesn't make sense.*

Will be changed into 'is reduced by'.

*Line 261: 'are slightly more off' – please rephrase this more precisely.*

We will rephrase this.

*Line 261: 'choice of retracker \*threshold\*' – I don't think you have compared different retrackers?*

Agreed. This will be corrected.

*Table 2: Does this suggest that LEPTA is more sensitive than the other methods to choice of threshold, for the median absolute deviation; i.e. when 50% is chosen then its performance is comparable to the point based approach? Do you think this ties into delta- r; i.e. if you choose a higher threshold then you are including more terrain at large ranges beyond the leading edge, which might degrade the LEPTA solution in a way that doesn't happen for the point based approach?*

We agree, and detailed discussion will be added to the revised manuscript.

*Line 264: Most of this opening paragraph seems simply to be repeating and summarising the results; i.e. not adding new insight, as I would expect in a discussion section.*

Agreed. This paragraph will be re-written.

*Line 266: I don't think the wording 'in terms of spatial patterns, the LEPTA method outperforms' is very clear; i.e. what it means for one pattern to outperform another. Please consider rewording.*

This paragraph will be re-written in the revised manuscript.

*Line 268: CryoSat-2 \*LRM\* height estimations'.*

This will be corrected.

*Line 268: 'Our results show moreover that the method is not very sensitive to changes in the definition of the end of the leading edge as it shows only millimetre-level uncertainties for the corrected heights when including multi-metre uncertainties on the definition of the end of the leading edge.' I don't think this statement is accurate – If I understand correctly, then I think you see mm-level differences on the median bias averaged over the whole LRM zone in 2019;*

*but this is very different to saying that the height measurements themselves will only vary by mm when you change delta-r by metres – I'm not sure that you have demonstrated this?*

Agreed. In the revised manuscript we will add some statistics on how the 3D position of the height measurements themselves will change (also lat/lon will change).

*Line 271: "the definition of the leading edge should be adjusted accordingly" – please clarify what you mean here. How do you adjust the definition of the leading edge, and what does it mean to be 'adjusted accordingly'?*

Indeed, we can only adjust the definition of the leading edge in case one knows the bias. In reality this is not the case. Hence, our statement is pointless and will be removed from the manuscript.

*Line 273: Please explain why you recommend a high resolution DEM when it has little impact on the method. Also what counts as 'high resolution'?*

This indeed looks a bit odd. From a conceptual point of view, we would opt for the highest resolution. We experimented with coarser resolutions (>900m) and found that the bias increases when the DEM resolution becomes coarser than 2 km. We will add these results to the manuscript and reformulate our statement.

*Line 276: 'the importance of \*accurately determining the\* impact point'?*

This will be corrected.

*Line 277: Do you show that your point based approach outperforms the slope based method? There seems to be a pretty large bias in the former, compared to the latter?*

The point-based approach outperforms the slope-based approach in terms of the median absolute deviation. This will be specified in the revised manuscript.

*Line 286: I am unconvinced by the attribution of differences to the Doppler slope correction – see previous major comment. Please provide more justification that this could be the source of such large differences and, if indeed this is the case, why (1) it does not affect LEPTA, and (2) you don't correct for it in your L2 processing.*

We agree with the referee. The statement originates from the discussion by Levinsen et al. (2016). In their study they used, however, Envisat Radar Altimetry-2 data. As such, the statement is not applicable and will be removed in the revised manuscript.

*Line 289: I think more explanation of how you filter waveforms is required, and how you can be sure that some of the performance improvement you see in LEPTA relative to ESA L2I is not simply due to the fact that you are applying stricter filtering criteria.*

Agreed. Please see also our response to one of the referee's major comments and the one to the comment on Line 68.

*Line 290: I'm not sure I understand this – doesn't it contradict line 136 where you say you adjust the interval if no DEM points are within the leading edge range?*

This sentence bypassed our proofreading and was not supposed to be in the manuscript. Will be removed in the revised version.

*Line 293: I don't think the opening sentence makes sense – applying to what? Also needs to make clear this is for non-interferometric data only.*

Agreed. Sentence will be rephrased to: 'Reducing slope-induced errors is of key importance when processing LRM data over ice sheets'.

*Line 299: Recommend that you do not need to start a new paragraph here.*

This will be implemented in the revised manuscript.

*Line 301: 'by the begin and end of the leading edge' – I don't think this is strictly correct; i.e. you do not limit yourself to the actual end of the leading edge.*

Agreed. Will be rephrased in revised manuscript.

*Line 304: 'almost identical' and 'good improvement' – it would be much more helpful to provide quantitative measures here.*

Agreed. Revised manuscript will include quantitative measures.

*Line 305: You don't evaluate LEPTA at the margins, as your analysis is restricted to the LRM zone only.*

Here, we referred to the margins of the LRM zone. This will be clarified in the revised manuscript.

*Line 306: 'radar altimetry'.*

This will be corrected.

*Line 306: I think somewhere you should flag that you have only assessed performance (1) in the interior, and (2) for Greenland. Therefore it still remains to be shown how the method performs over the more complex ice margin terrain and also over Antarctica. Obviously your thoughts on whether you expect comparable, better or worse performance would be of interest to the reader, and this might fit better within your discussion section.*

We agree. We have assessed LEPTA separately over Antarctica (although using a 8 x 8 km BLF), and the results are similar to Greenland i.e. closer to ICESat-2 measurements in East Antarctica but more biases in West Antarctica. However, based on the improved implementation mentioned above, this experiment could be added as supplementary material if the referee is interested and the Editor allows.

## References

Bamber, J. L.: Ice sheet altimeter processing scheme, International Journal of Remote Sensing, 15, 925–938, <https://doi.org/10.1080/01431169408954125>, 1994.

Bouzinac, C.: CryoSat Product Handbook, Tech. rep., ESA, available online at [https://earth.esa.int/documents/10174/125272/CryoSat\\_Product\\_Handbook](https://earth.esa.int/documents/10174/125272/CryoSat_Product_Handbook), 2012, accessed Apr. 6, 2020.

Hai, G., Xie, H., Du, W., Xia, M., Tong, X., and Li, R. Characterizing slope correction methods applied to satellite radar altimetry data: A case study around Dome Argus in East Antarctica, *Advances in Space Research*, 67(7), 2120–2139, <https://doi.org/10.1016/j.asr.2021.01.016>, 2021.

Levinsen, J. F., Simonsen, S. B., Sorensen, L. S., and Forsberg, R.: The Impact of DEM Resolution on Relocating Radar Altimetry Data Over Ice Sheets, *IEEE Journal of Selected Topics in Applied Earth Observations and Remote Sensing*, 9, 3158–3163, <https://doi.org/10.1109/jstars.2016.2587684>, 2016.

Nilsson, J., Gardner, A., Sandberg Sørensen, L., and Forsberg, R.: Improved retrieval of land ice topography from CryoSat-2 data and its impact for volume-change estimation of the Greenland Ice Sheet, *The Cryosphere*, 10, 2953–2969, <https://doi.org/10.5194/tc-10-2953-2016>, 2016.

Roemer, S., Legrésy, B., Horwath, M., and Dietrich, R.: Refined analysis of radar altimetry data applied to the region of the subglacial Lake Vostok/Antarctica, *Remote Sensing of Environment*, 106, 269–284, <https://doi.org/10.1016/j.rse.2006.02.026>, 2007.

Tilling, R. L., Ridout, A. & Shepherd, A.: Estimating Arctic sea ice thickness and volume using CryoSat-2 radar altimeter data, *Advances in Space Research*, 62, 1203–1225, <https://doi.org/10.1016/j.asr.2017.10.051>, 2018.
